# Supplementary material
Source: Springer Nature journal article supplement (https://www.springermedizin.de/resource/supplementary/12936_2012_2680_MOESM2_ESM.pdf/9544748)
Supplement: MOESM2 [file 9544748]

■ 2011 ■ 2012

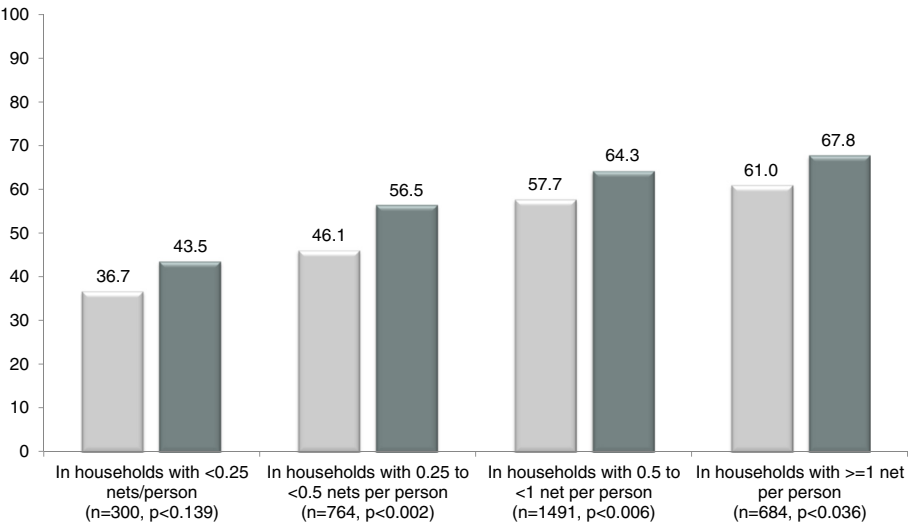

Excludes households with zero nets. P-values given for two-sample t-test comparing mean net use in 2011 and 2012 within each category of household net ownership.
